# Supplementary material
Source: PubMed Central journal article supplement (PMC3127932)
Supplement: 1101738108_pnas.1101738108_SI.pdf [file 1101738108_pnas.1101738108_SI.pdf]

# Supporting Information

Antkowiak et al. 10.1073/pnas.1101738108

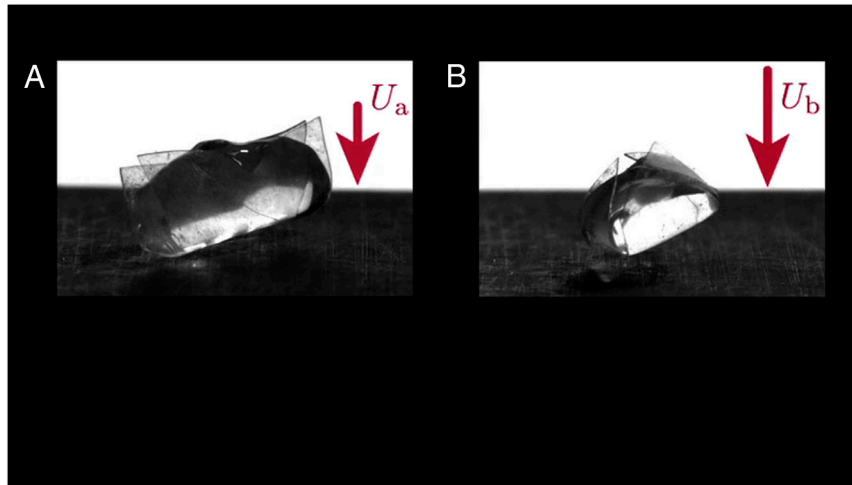

**Movie S1.** Instant capillary origami. In this sequence, the dynamic wrapping of a drop by an elastic membrane upon impact is demonstrated with experiments. The shape selection of the final bundle with drop impact velocity is illustrated as well.

[Movie S1 \(MOV\)](#)

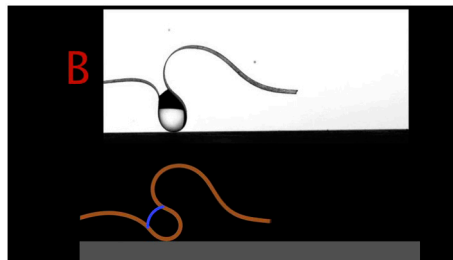

**Movie S2.** Elastocapillary shape selection in 2D. Typical encapsulation experiments are shown in this movie and confronted with our simple model.

[Movie S2 \(MOV\)](#)

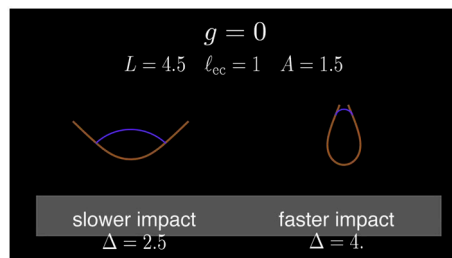

**Movie S3.** Elastocapillary shape selection without gravity. In this movie, the possibility of shape selection without gravity is demonstrated numerically.

[Movie S3 \(MOV\)](#)
